# Supplementary material
Source: PubMed Central journal article supplement (PMC3617812)
Supplement: NIHMS447613-supplement-Supplementary_file_S2.pdf [file NIHMS447613-supplement-Supplementary_file_S2.pdf]

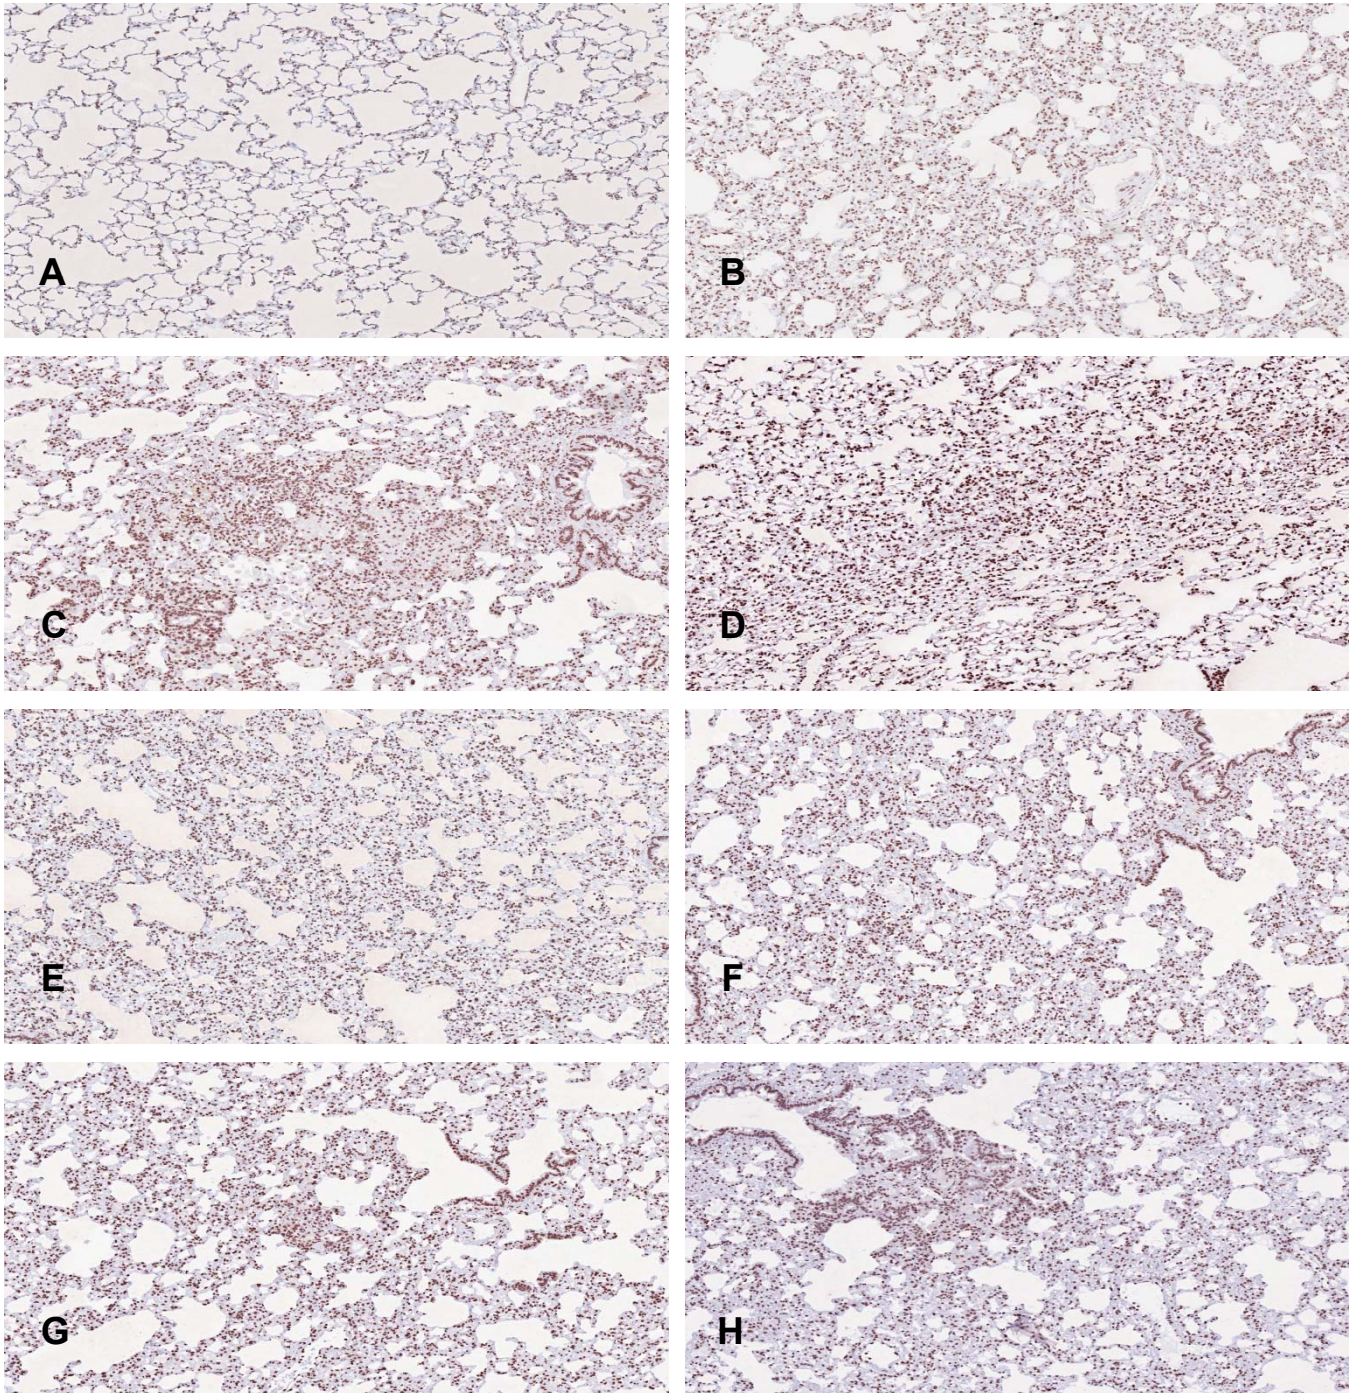

Supplementary Figure 1: Photomicrographs showing immunohistochemical staining for 8-OHdG (brown staining) on lung sections from rats euthanized at 48 weeks after initiation of treatment for the various groups. 6wk control animals were euthanized at the start of the experiment, 48wk controls were euthanized at 48 weeks post-irradiation. The different panels are A) 6wk control; B) 48wk control; C) whole thorax irradiation (LR); D) whole thorax irradiation +PEG inj; E) LR + genistein (2w); F) LR + Euk-207 (2w); G) LR + genistein (0w); H) LR + Euk-207 (0w)). Original magnification 10x.



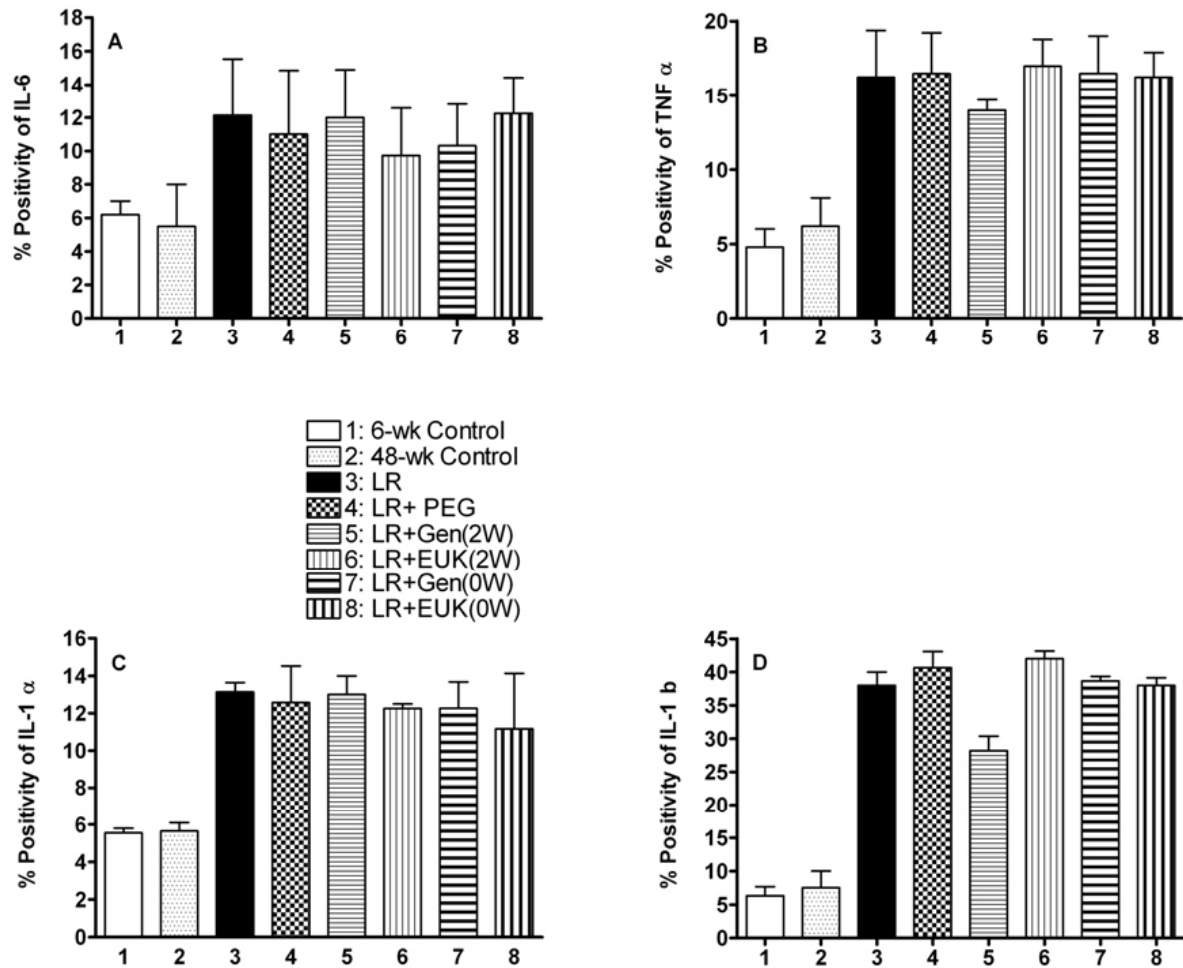

**Supplementary Figure 2:** Analysis of expression of inflammatory cytokines as percent positivity (the ratio of positive pixels/total number of positive and negative pixels in the tissue section with air spaces excluded) in the lungs of the rats at time of euthanasia at 48 weeks post-irradiation. A) Analysis of IL-6 staining; B) Analysis of TNF- $\alpha$  staining; C) Analysis of IL-1 $\alpha$  staining; D) Analysis of IL-1 $\beta$  staining. Each bar represents the mean ( $\pm$ SEM) for all rats available for analysis (Gp1 n=4, Gp2 n=8, Gp3 n=3, Gp4 n=5, Gp 5 n=5, Gp 6 n=3, Gp 7 n= 4, Gp 8 n=4). Labeling of the treatment groups is as indicated in the legend to Figure 2. 6-wk control animals were euthanized at the start of the experiment, 48-wk controls were euthanized at 48 weeks post-irradiation.

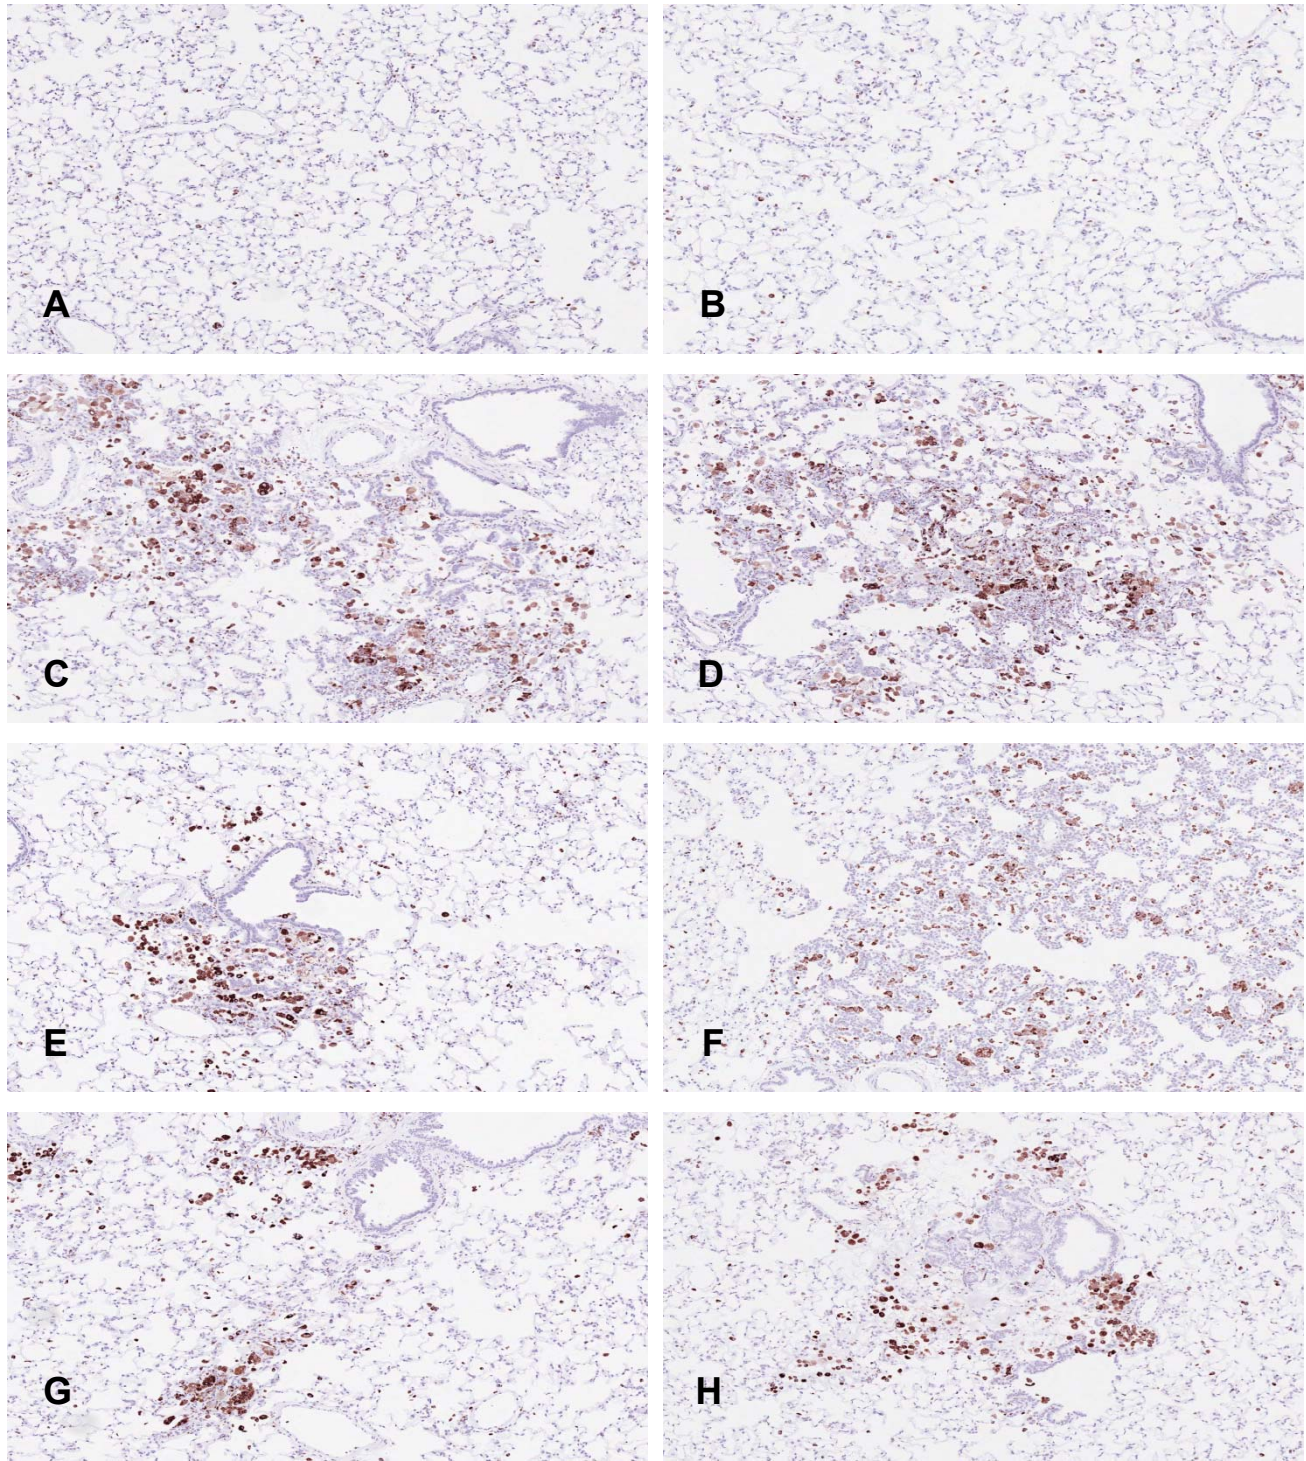

Supplementary Figure 3: Photomicrographs showing immunohistochemical staining (brown staining) for ED-1 (activated macrophages) on lung sections from rats euthanized at 48 weeks after initiation of treatment for the various groups. 6wk control animals were euthanized at the start of the experiment, 48wk controls were euthanized at 48 weeks post-irradiation. The different panels are A) 6wk control; B) 48wk control; C) whole thorax irradiation (LR); D) whole thorax irradiation +PEG inj; E) LR + genistein (2w); F) LR + Euk-207 (2w); G) LR + genistein (0w); H) LR + Euk-207 (0w)). Original magnification 10x.



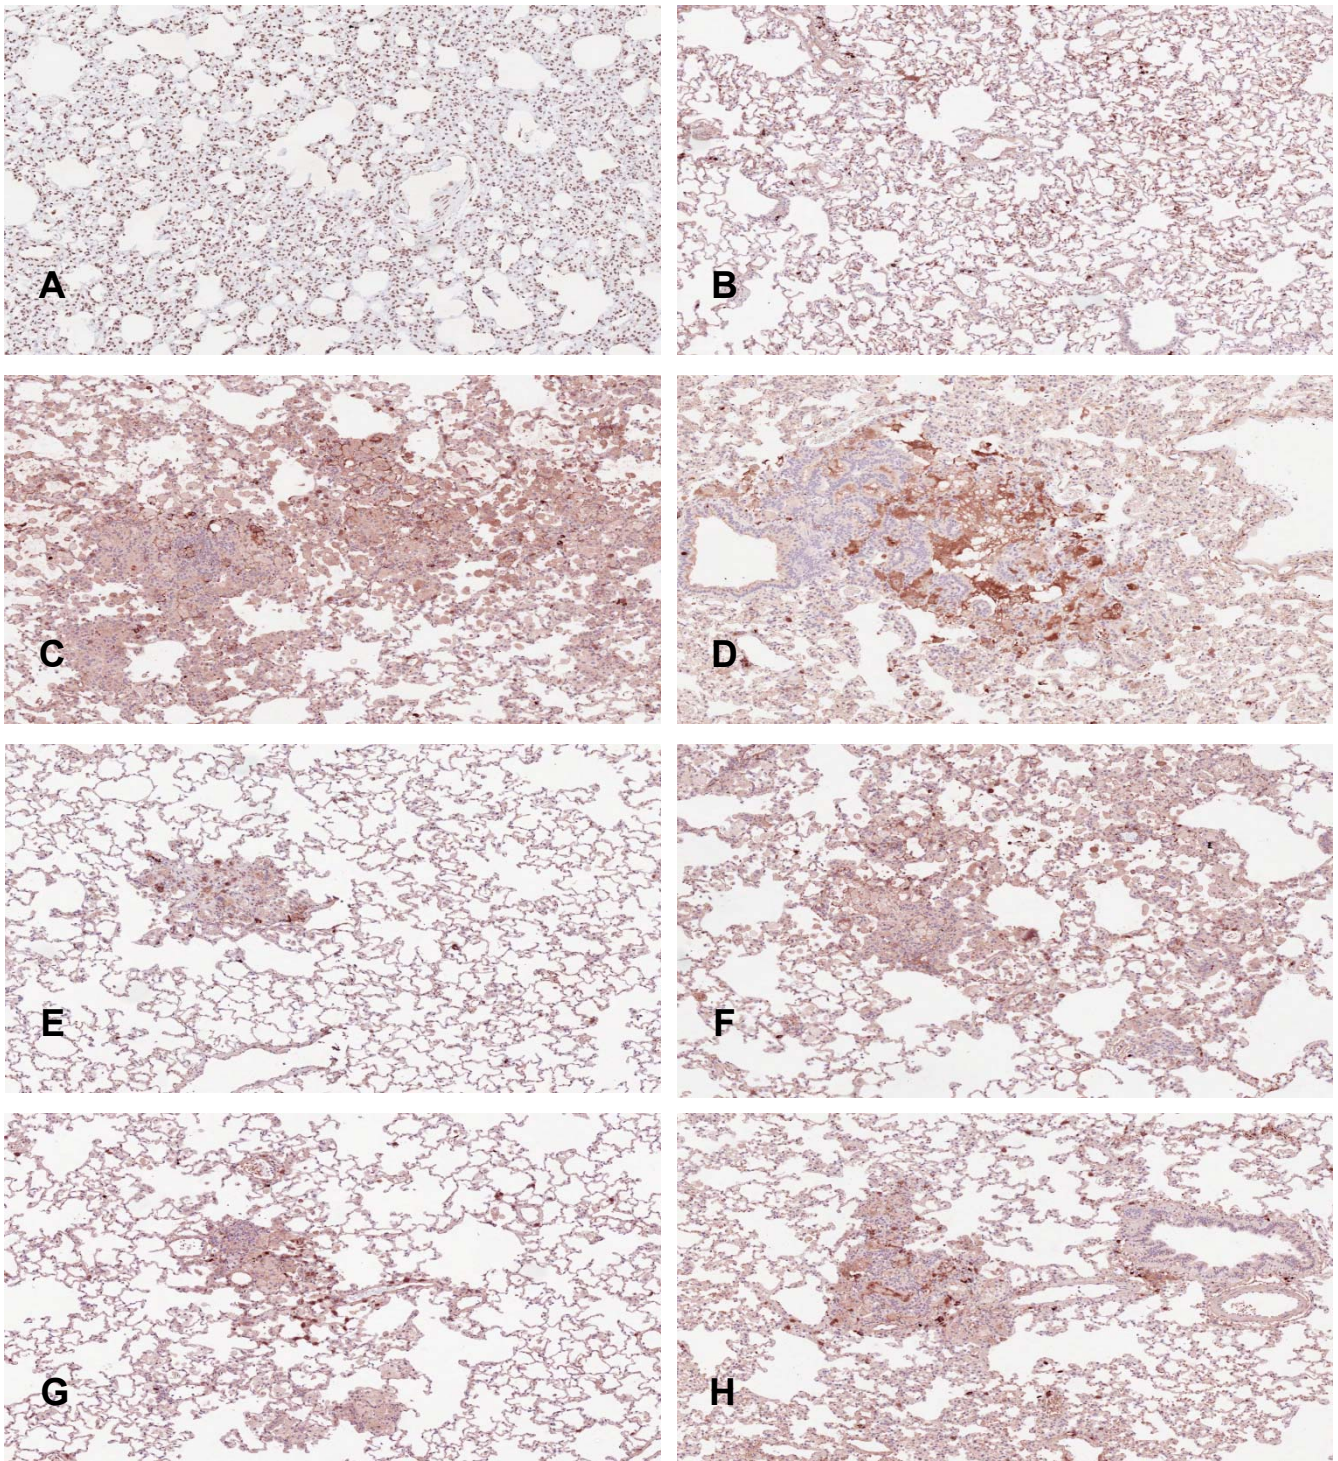

Supplementary Figure 4: Photomicrographs showing immunohistochemical staining for TGF- $\beta$  (red staining) on lung sections from rats euthanized at 48 weeks after initiation of treatment for the various groups. 6wk control animals were euthanized at the start of the experiment, 48wk controls were euthanized at 48 weeks post-irradiation. The different panels are A) 6wk control; B) 48wk control; C) whole thorax irradiation (LR); D) whole thorax irradiation +PEG inj; E) LR + genistein (2w); F) LR + Euk-207 (2w); G) LR + genistein (0w); H) LR + Euk-207 (0w)). Original magnification 10x.
